# Supplementary material
Source: PubMed Central journal article supplement (PMC5860883)
Supplement: NIHMS948258-supplement-S_Table_1.pdf [file NIHMS948258-supplement-S_Table_1.pdf]

| prot_acc    | GN      | prot_desc                                                                                                              | prot_mass | prot_score<br>Day 0 | prot_score<br>Day 24 | prot_matches_sig<br>Day 0 | prot_matches_sig<br>Day 24 | prot_sequences_sig<br>Day 0 | prot_sequences_sig<br>Day 24 | prot_cover<br>Day 0 | prot_cover<br>Day 24 |
|-------------|---------|------------------------------------------------------------------------------------------------------------------------|-----------|---------------------|----------------------|---------------------------|----------------------------|-----------------------------|------------------------------|---------------------|----------------------|
| 1433B_MOUSE | Ywhab   | 14-3-3 protein beta/alpha OS=Mus musculus GN=Ywhab PE=1 SV=3                                                           | 28069     | 241                 | 299                  | 6                         | 9                          | 5                           | 6                            | 18.3                | 24                   |
| 1433E_MOUSE | Ywhae   | 14-3-3 protein epsilon OS=Mus musculus GN=Ywhae PE=1 SV=1                                                              | 29155     | 214                 | 555                  | 9                         | 20                         | 5                           | 10                           | 21.6                | 45.5                 |
| 1433F_MOUSE | Ywhah   | 14-3-3 protein eta OS=Mus musculus GN=Ywhah PE=1 SV=2                                                                  | 28194     | 195                 | 267                  | 6                         | 7                          | 4                           | 6                            | 15.9                | 22                   |
| 1433G_MOUSE | Ywhag   | 14-3-3 protein gamma OS=Mus musculus GN=Ywhag PE=1 SV=2                                                                | 28285     | 346                 | 446                  | 11                        | 14                         | 8                           | 9                            | 31.2                | 35.2                 |
| 1433T_MOUSE | Ywhaq   | 14-3-3 protein theta OS=Mus musculus GN=Ywhaq PE=1 SV=1                                                                | 27761     | 226                 | 249                  | 6                         | 6                          | 4                           | 4                            | 15.9                | 15.9                 |
| 1433Z_MOUSE | Ywhaz   | 14-3-3 protein zeta/delta OS=Mus musculus GN=Ywhaz PE=1 SV=1                                                           | 27754     | 338                 | 415                  | 12                        | 14                         | 7                           | 7                            | 40.4                | 35.9                 |
| 2AAA_MOUSE  | Ppp2r1a | Serine/threonine-protein phosphatase 2A 65 kDa regulatory subunit A alpha isoform OS=Mus musculus GN=Ppp2r1a PE=1 SV=1 | 65281     | 61                  | 57                   | 1                         | 1                          | 1                           | 1                            | 1.7                 | 1.7                  |
| 4F2_MOUSE   | Slc3a2  | 4F2 cell-surface antigen heavy chain OS=Mus musculus GN=Slc3a2 PE=1 SV=1                                               | 58300     | 454                 | 325                  | 13                        | 9                          | 9                           | 8                            | 20.7                | 16.9                 |
| A2MG_MOUSE  | A2m     | Alpha-2-macroglobulin-P OS=Mus musculus GN=A2m PE=2 SV=2                                                               | 164248    | 79                  | 118                  | 7                         | 12                         | 2                           | 3                            | 1.8                 | 2.4                  |
| ACTB_MOUSE  | Actb    | Actin, cytoplasmic 1 OS=Mus musculus GN=Actb PE=1 SV=1                                                                 | 41710     | 995                 | 1160                 | 95                        | 88                         | 18                          | 19                           | 62.9                | 62.9                 |
| ACTC_MOUSE  | Actc1   | Actin, alpha cardiac muscle 1 OS=Mus musculus GN=Actc1 PE=1 SV=1                                                       | 41992     | 710                 | 670                  | 63                        | 48                         | 15                          | 13                           | 55.4                | 48                   |
| ACTN1_MOUSE | Actn1   | Alpha-actinin-1 OS=Mus musculus GN=Actn1 PE=1 SV=1                                                                     | 103004    | 176                 | 446                  | 4                         | 9                          | 3                           | 7                            | 3.9                 | 9.2                  |
| ALBU_MOUSE  | Alb     | Serum albumin OS=Mus musculus GN=Alb PE=1 SV=3                                                                         | 68648     | 128                 | 121                  | 10                        | 10                         | 1                           | 1                            | 2.1                 | 2.1                  |
| ALDOA_MOUSE | Aldoa   | Fructose-bisphosphate aldolase A OS=Mus musculus GN=Aldoa PE=1 SV=2                                                    | 39331     | 206                 | 144                  | 5                         | 4                          | 5                           | 4                            | 14.3                | 14                   |
| AMPN_MOUSE  | Anpep   | Aminopeptidase N OS=Mus musculus GN=Anpep PE=1 SV=4                                                                    | 109582    | 159                 | 753                  | 5                         | 30                         | 4                           | 16                           | 6                   | 25.6                 |
| ANXA1_MOUSE | Anxa1   | Annexin A1 OS=Mus musculus GN=Anxa1 PE=1 SV=2                                                                          | 38710     | 508                 | 822                  | 15                        | 38                         | 8                           | 13                           | 29.5                | 41.9                 |
| ANXA2_MOUSE | Anxa2   | Annexin A2 OS=Mus musculus GN=Anxa2 PE=1 SV=2                                                                          | 38652     | 683                 | 834                  | 47                        | 63                         | 12                          | 14                           | 36                  | 46.9                 |
| ANXA3_MOUSE | Anxa3   | Annexin A3 OS=Mus musculus GN=Anxa3 PE=1 SV=4                                                                          | 36362     | 65                  | 50                   | 2                         | 1                          | 2                           | 1                            | 7.4                 | 5                    |
| ANXA4_MOUSE | Anxa4   | Annexin A4 OS=Mus musculus GN=Anxa4 PE=1 SV=4                                                                          | 35893     | 214                 | 684                  | 7                         | 23                         | 4                           | 8                            | 16.6                | 29.5                 |
| ANXA5_MOUSE | Anxa5   | Annexin A5 OS=Mus musculus GN=Anxa5 PE=1 SV=1                                                                          | 35730     | 581                 | 1208                 | 26                        | 71                         | 12                          | 22                           | 42                  | 67.1                 |
| ANXA6_MOUSE | Anxa6   | Annexin A6 OS=Mus musculus GN=Anxa6 PE=1 SV=3                                                                          | 75837     | 495                 | 1026                 | 18                        | 47                         | 11                          | 22                           | 23.2                | 42.1                 |
| APOE_MOUSE  | ApoE    | Apolipoprotein E OS=Mus musculus GN=ApoE PE=1 SV=2                                                                     | 35844     | 108                 | 619                  | 4                         | 23                         | 3                           | 12                           | 10                  | 35                   |
| ARF1_MOUSE  | Arf1    | ADP-ribosylation factor 1 OS=Mus musculus GN=Arf1 PE=1 SV=2                                                            | 20684     | 265                 | 203                  | 11                        | 9                          | 6                           | 4                            | 43.6                | 32                   |
| ARF6_MOUSE  | Arf6    | ADP-ribosylation factor 6 OS=Mus musculus GN=Arf6 PE=1 SV=2                                                            | 20069     | 50                  | 82                   | 2                         | 4                          | 2                           | 2                            | 5.7                 | 12                   |
| ARP3_MOUSE  | Actr3   | Actin-related protein 3 OS=Mus musculus GN=Actr3 PE=1 SV=3                                                             | 47327     | 95                  | 90                   | 2                         | 2                          | 1                           | 2                            | 4.8                 | 4.8                  |
| AT1A1_MOUSE | Atp1a1  | Sodium/potassium-transporting ATPase subunit alpha-1 OS=Mus musculus GN=Atp1a1 PE=1 SV=3                               | 112910    | 616                 | 972                  | 20                        | 35                         | 13                          | 17                           | 18.5                | 23                   |
| BASI_MOUSE  | Bsg     | Basigin OS=Mus musculus GN=Bsg PE=1 SV=2                                                                               | 42418     | 166                 | 77                   | 9                         | 7                          | 4                           | 2                            | 10.3                | 9.5                  |
| BASP1_MOUSE | Basp1   | Brain acid soluble protein 1 OS=Mus musculus GN=Basp1 PE=1 SV=3                                                        | 22074     | 364                 | 321                  | 11                        | 7                          | 8                           | 6                            | 51.3                | 38.1                 |
| CALM_MOUSE  | Calm1   | Calmodulin OS=Mus musculus GN=Calm1 PE=1 SV=2                                                                          | 16827     | 293                 | 272                  | 16                        | 21                         | 5                           | 5                            | 38.3                | 38.3                 |
| CAP1_MOUSE  | Cap1    | Adenylyl cyclase-associated protein 1 OS=Mus musculus GN=Cap1 PE=1 SV=4                                                | 51532     | 32                  | 102                  | 1                         | 4                          | 1                           | 3                            | 1.7                 | 12.4                 |
| CD44_MOUSE  | Cd44    | CD44 antigen OS=Mus musculus GN=Cd44 PE=1 SV=3                                                                         | 85565     | 78                  | 62                   | 3                         | 3                          | 1                           | 1                            | 1.5                 | 1.5                  |
| CD81_MOUSE  | Cd81    | CD81 antigen OS=Mus musculus GN=Cd81 PE=1 SV=2                                                                         | 25797     | 62                  | 94                   | 4                         | 6                          | 1                           | 1                            | 8.5                 | 8.5                  |
| CDC42_MOUSE | Cdc42   | Cell division control protein 42 homolog OS=Mus musculus GN=Cdc42 PE=1 SV=2                                            | 21245     | 172                 | 211                  | 7                         | 9                          | 4                           | 4                            | 25.7                | 25.7                 |
| CLH1_MOUSE  | Cltc    | Clathrin heavy chain 1 OS=Mus musculus GN=Cltc PE=1 SV=3                                                               | 191435    | 221                 | 555                  | 7                         | 14                         | 6                           | 12                           | 6.1                 | 10.1                 |
| CLIC1_MOUSE | Clic1   | Chloride intracellular channel protein 1 OS=Mus musculus GN=Clic1 PE=1 SV=3                                            | 26996     | 60                  | 103                  | 2                         | 3                          | 2                           | 3                            | 10.8                | 14.1                 |
| CLIC4_MOUSE | Clic4   | Chloride intracellular channel protein 4 OS=Mus musculus GN=Clic4 PE=1 SV=3                                            | 28711     | 90                  | 170                  | 3                         | 5                          | 3                           | 4                            | 16.6                | 19.8                 |
| CO1A1_MOUSE | Col1a1  | Collagen alpha-1(I) chain OS=Mus musculus GN=Col1a1 PE=1 SV=4                                                          | 137948    | 1728                | 539                  | 76                        | 27                         | 38                          | 10                           | 42                  | 8.5                  |
| CO1A2_MOUSE | Col1a2  | Collagen alpha-2(I) chain OS=Mus musculus GN=Col1a2 PE=1 SV=2                                                          | 129478    | 996                 | 608                  | 35                        | 25                         | 20                          | 10                           | 29.5                | 9.9                  |
| CO3_MOUSE   | C3      | Complement C3 OS=Mus musculus GN=C3 PE=1 SV=3                                                                          | 186366    | 111                 | 189                  | 3                         | 5                          | 3                           | 5                            | 1.5                 | 3.3                  |
| COCA1_MOUSE | Col12a1 | Collagen alpha-1(XII) chain OS=Mus musculus GN=Col12a1 PE=2 SV=3                                                       | 340004    | 45                  | 115                  | 1                         | 4                          | 1                           | 4                            | 0.3                 | 1.3                  |
| COF1_MOUSE  | Cfl1    | Cofilin-1 OS=Mus musculus GN=Cfl1 PE=1 SV=3                                                                            | 18548     | 253                 | 375                  | 12                        | 13                         | 5                           | 8                            | 46.4                | 43.4                 |
| CSKP_MOUSE  | Cask    | Peripheral plasma membrane protein CASK OS=Mus musculus GN=Cask PE=1 SV=2                                              | 105042    | 94                  | 86                   | 3                         | 2                          | 2                           | 2                            | 3.7                 | 1.7                  |
| CTNA1_MOUSE | Ctnna1  | Catenin alpha-1 OS=Mus musculus GN=Ctnna1 PE=1 SV=1                                                                    | 100044    | 52                  | 309                  | 2                         | 8                          | 2                           | 7                            | 5                   | 12.6                 |
| DEST_MOUSE  | Dstn    | Destrin OS=Mus musculus GN=Dstn PE=1 SV=3                                                                              | 18509     | 61                  | 79                   | 2                         | 2                          | 2                           | 2                            | 10.9                | 14.5                 |
| DYH1_MOUSE  | Dync1h1 | Cytoplasmic dynein 1 heavy chain 1 OS=Mus musculus GN=Dync1h1 PE=1 SV=2                                                | 531710    | 44                  | 200                  | 1                         | 6                          | 1                           | 6                            | 0.3                 | 1.8                  |
| EDIL3_MOUSE | Edil3   | EGF-like repeat and discoidin I-like domain-containing protein 3 OS=Mus musculus GN=Edil3 PE=1 SV=2                    | 53677     | 780                 | 678                  | 75                        | 50                         | 16                          | 13                           | 37.9                | 34                   |
| EF1A1_MOUSE | Eef1a1  | Elongation factor 1-alpha 1 OS=Mus musculus GN=Eef1a1 PE=1 SV=3                                                        | 50082     | 369                 | 438                  | 24                        | 32                         | 7                           | 9                            | 19.3                | 22.5                 |
| EF2_MOUSE   | Eef2    | Elongation factor 2 OS=Mus musculus GN=Eef2 PE=1 SV=2                                                                  | 95253     | 220                 | 326                  | 6                         | 9                          | 6                           | 9                            | 10.5                | 13.5                 |
| EHD1_MOUSE  | Ehd1    | EH domain-containing protein 1 OS=Mus musculus GN=Ehd1 PE=1 SV=1                                                       | 60565     | 105                 | 147                  | 2                         | 5                          | 2                           | 3                            | 7.1                 | 8.4                  |
| ENOA_MOUSE  | Eno1    | Alpha-enolase OS=Mus musculus GN=Eno1 PE=1 SV=3                                                                        | 47111     | 630                 | 508                  | 28                        | 23                         | 12                          | 10                           | 33.6                | 30.9                 |
| EZR1_MOUSE  | Ezr     | Ezrin OS=Mus musculus GN=Ezr PE=1 SV=3                                                                                 | 69364     | 222                 | 233                  | 9                         | 8                          | 6                           | 6                            | 13.1                | 11.4                 |
| FABP5_MOUSE | Fabp5   | Fatty acid-binding protein, epidermal OS=Mus musculus GN=Fabp5 PE=1 SV=3                                               | 15127     | 32                  | 66                   | 1                         | 1                          | 1                           | 1                            | 6.7                 | 6.7                  |
| FINC_MOUSE  | Fn1     | Fibronectin OS=Mus musculus GN=Fn1 PE=1 SV=4                                                                           | 272368    | 2549                | 2319                 | 165                       | 137                        | 46                          | 42                           | 31.2                | 28.6                 |
| FLNA_MOUSE  | Flna    | Filamin-A OS=Mus musculus GN=Flna PE=1 SV=5                                                                            | 281046    | 234                 | 163                  | 6                         | 5                          | 5                           | 4                            | 2.3                 | 1.5                  |
| FRIL1_MOUSE | Ftl1    | Ferritin light chain 1 OS=Mus musculus GN=Ftl1 PE=1 SV=2                                                               | 20790     | 70                  | 130                  | 3                         | 5                          | 3                           | 3                            | 15.8                | 30.6                 |
| FSCN1_MOUSE | Fscn1   | Fascin OS=Mus musculus GN=Fscn1 PE=1 SV=4                                                                              | 54474     | 51                  | 96                   | 2                         | 3                          | 2                           | 3                            | 6.9                 | 8.7                  |
| G3P_MOUSE   | Gapdh   | Glyceraldehyde-3-phosphate dehydrogenase OS=Mus musculus GN=Gapdh PE=1 SV=3                                            | 35787     | 439                 | 369                  | 24                        | 21                         | 8                           | 8                            | 34.5                | 42.9                 |
| GBB1_MOUSE  | Gnb1    | Guanine nucleotide-binding protein G(I)/G(S)/G(T) subunit beta-1 OS=Mus musculus GN=Gnb1 PE=1 SV=2                     | 37353     | 134                 | 233                  | 5                         | 10                         | 3                           | 5                            | 9.1                 | 13.2                 |
| GBG12_MOUSE | Gng12   | Guanine nucleotide-binding protein G(I)/G(S)/G(O) subunit gamma-12 OS=Mus musculus GN=Gng12 PE=1 SV=2                  | 7992      | 142                 | 100                  | 3                         | 7                          | 3                           | 2                            | 47.2                | 25                   |
| GDIB_MOUSE  | Gdi2    | Rab GDP dissociation inhibitor beta OS=Mus musculus GN=Gdi2 PE=1 SV=1                                                  | 50505     | 215                 | 447                  | 6                         | 15                         | 5                           | 9                            | 13.9                | 28.3                 |
| GDIR1_MOUSE | Arhgdia | Rho GDP-dissociation inhibitor 1 OS=Mus musculus GN=Arhgdia PE=1 SV=3                                                  | 23393     | 106                 | 121                  | 3                         | 5                          | 2                           | 2                            | 15.2                | 15.2                 |
| GELS_MOUSE  | Gsn     | Gelsolin OS=Mus musculus GN=Gsn PE=1 SV=3                                                                              | 85888     | 67                  | 495                  | 2                         | 17                         | 2                           | 12                           | 4.2                 | 23.6                 |
| GNAI2_MOUSE | Gnai2   | Guanine nucleotide-binding protein G(i) subunit alpha-2 OS=Mus musculus GN=Gnai2 PE=1 SV=2                             | 40463     | 321                 | 556                  | 14                        | 32                         | 6                           | 9                            | 24.8                | 33.5                 |
| GNAS1_MOUSE | Gnas    | Guanine nucleotide-binding protein G(s) subunit alpha isoforms XLas OS=Mus musculus GN=Gnas PE=1 SV=2                  | 121429    | 139                 | 220                  | 7                         | 14                         | 3                           | 5                            | 3.2                 | 4.7                  |

|             |          |                                                                                                         |        |     |      |     |     |    |      |      |    |
|-------------|----------|---------------------------------------------------------------------------------------------------------|--------|-----|------|-----|-----|----|------|------|----|
| GPC1_MOUSE  | Gpc1     | Glypican-1 OS=Mus musculus GN=Gpc1 PE=1 SV=1                                                            | 61321  | 31  | 235  | 1   | 8   | 1  | 5    | 2.5  | 14 |
| GSTP1_MOUSE | Gstp1    | Glutathione S-transferase P 1 OS=Mus musculus GN=Gstp1 PE=1 SV=2                                        | 23594  | 138 | 203  | 5   | 6   | 3  | 20.5 | 20.5 |    |
| HA1B_MOUSE  | H2-K1    | H-2 class I histocompatibility antigen, K-B alpha chain OS=Mus musculus GN=H2-K1                        | 41276  | 105 | 165  | 4   | 7   | 2  | 5.1  | 12.2 |    |
| HBE_MOUSE   | Hbb-y    | Hemoglobin subunit epsilon-Y2 OS=Mus musculus GN=Hbb-y PE=1 SV=2                                        | 16126  | 52  | 38   | 5   | 5   | 1  | 6.8  | 6.8  |    |
| HS90A_MOUSE | Hsp90aa1 | Heat shock protein HSP 90-alpha OS=Mus musculus GN=Hsp90aa1 PE=1 SV=4                                   | 84735  | 230 | 355  | 7   | 8   | 6  | 10.6 | 13.2 |    |
| HS90B_MOUSE | Hsp90ab1 | Heat shock protein HSP 90-beta OS=Mus musculus GN=Hsp90ab1 PE=1 SV=3                                    | 83229  | 292 | 357  | 11  | 11  | 7  | 10.8 | 12   |    |
| HSP7C_MOUSE | Hspa8    | Heat shock cognate 71 kDa protein OS=Mus musculus GN=Hspa8 PE=1 SV=1                                    | 70827  | 593 | 784  | 23  | 29  | 15 | 29.3 | 35.3 |    |
| IF5A1_MOUSE | Eif5a    | Eukaryotic translation initiation factor 5A-1 OS=Mus musculus GN=Eif5a PE=1 SV=2                        | 16821  | 78  | 82   | 3   | 2   | 2  | 22.7 | 22.7 |    |
| IGSF8_MOUSE | igsf8    | Immunoglobulin superfamily member 8 OS=Mus musculus GN=igsf8 PE=1 SV=2                                  | 64970  | 70  | 271  | 2   | 9   | 6  | 4.7  | 15.9 |    |
| IMB1_MOUSE  | kpnb1    | Importin subunit beta-1 OS=Mus musculus GN=kpnb1 PE=1 SV=2                                              | 97122  | 33  | 103  | 1   | 2   | 2  | 1.4  | 3.1  |    |
| IQGA1_MOUSE | Iqgap1   | Ras GTPase-activating-like protein IQGAP1 OS=Mus musculus GN=iqgap1 PE=1 SV=2                           | 188624 | 226 | 407  | 5   | 9   | 5  | 4.4  | 9.2  |    |
| ITAV_MOUSE  | Itgav    | Integrin alpha-V OS=Mus musculus GN=Itgav PE=1 SV=2                                                     | 115287 | 166 | 500  | 6   | 14  | 5  | 7.2  | 12   |    |
| ITB1_MOUSE  | Itgb1    | Integrin beta-1 OS=Mus musculus GN=Itgb1 PE=1 SV=1                                                      | 88173  | 161 | 298  | 6   | 10  | 4  | 5.3  | 12.9 |    |
| ITIH2_MOUSE | Itih2    | Inter-alpha-trypsin inhibitor heavy chain H2 OS=Mus musculus GN=Itih2 PE=1 SV=1                         | 105861 | 272 | 471  | 10  | 17  | 6  | 6.7  | 9.3  |    |
| ITIH3_MOUSE | Itih3    | Inter-alpha-trypsin inhibitor heavy chain H3 OS=Mus musculus GN=Itih3 PE=1 SV=1                         | 99296  | 42  | 72   | 1   | 3   | 1  | 1.1  | 2.7  |    |
| K1C10_MOUSE | Krt10    | Keratin, type I cytoskeletal 10 OS=Mus musculus GN=Krt10 PE=1 SV=3                                      | 57735  | 333 | 79   | 29  | 3   | 2  | 10   | 3.7  |    |
| K22E_MOUSE  | Krt2     | Keratin, type II cytoskeletal 2 epidermal OS=Mus musculus GN=Krt2 PE=1 SV=1                             | 70880  | 125 | 104  | 9   | 2   | 2  | 3.3  | 3.3  |    |
| K2C5_MOUSE  | Krt5     | Keratin, type II cytoskeletal 5 OS=Mus musculus GN=Krt5 PE=1 SV=1                                       | 61729  | 208 | 60   | 9   | 2   | 3  | 5.7  | 2.1  |    |
| K2C79_MOUSE | Krt79    | Keratin, type II cytoskeletal 79 OS=Mus musculus GN=Krt79 PE=1 SV=2                                     | 57517  | 88  | 77   | 2   | 2   | 2  | 2.3  | 4.3  |    |
| KPYM_MOUSE  | Pkm      | Pyruvate kinase PKM OS=Mus musculus GN=Pkm PE=1 SV=4                                                    | 57808  | 603 | 678  | 27  | 25  | 12 | 29.8 | 33   |    |
| LAMP1_MOUSE | Lamp1    | Lysosome-associated membrane glycoprotein 1 OS=Mus musculus GN=Lamp1 PE=1 SV=1                          | 43837  | 117 | 218  | 5   | 9   | 3  | 7.6  | 11.3 |    |
| LAMP2_MOUSE | Lamp2    | Lysosome-associated membrane glycoprotein 2 OS=Mus musculus GN=Lamp2 PE=1 SV=1                          | 45652  | 63  | 72   | 3   | 2   | 2  | 4.3  | 4.1  |    |
| LAT1_MOUSE  | Slc7a5   | Large neutral amino acids transporter small subunit 1 OS=Mus musculus GN=Slc7a5                         | 55836  | 233 | 213  | 7   | 5   | 4  | 16   | 16   |    |
| LDHA_MOUSE  | Ldha     | L-lactate dehydrogenase A chain OS=Mus musculus GN=Ldha PE=1 SV=3                                       | 36475  | 426 | 369  | 18  | 14  | 8  | 26.8 | 25.6 |    |
| LEG1_MOUSE  | Lgals1   | Galectin-1 OS=Mus musculus GN=Lgals1 PE=1 SV=3                                                          | 14856  | 146 | 181  | 9   | 7   | 2  | 17.8 | 25.2 |    |
| LRP1_MOUSE  | Lrp1     | Prolow-density lipoprotein receptor-related protein 1 OS=Mus musculus GN=Lrp1                           | 504411 | 39  | 198  | 1   | 4   | 1  | 0.2  | 0.9  |    |
| MARCS_MOUSE | Marcks   | Myristoylated alanine-rich C-kinase substrate OS=Mus musculus GN=Marcks PE=1 SV=1                       | 29644  | 173 | 201  | 8   | 10  | 4  | 16.8 | 16.8 |    |
| MFGM_MOUSE  | Mfge8    | Lactadherin OS=Mus musculus GN=Mfge8 PE=1 SV=3                                                          | 51208  | 895 | 1287 | 125 | 331 | 17 | 42.8 | 44.7 |    |
| MOES_MOUSE  | Msn      | Moesin OS=Mus musculus GN=Msn PE=1 SV=3                                                                 | 67725  | 771 | 1229 | 38  | 47  | 19 | 35   | 45.2 |    |
| MOT1_MOUSE  | Slc16a1  | Monocarboxylate transporter 1 OS=Mus musculus GN=Slc16a1 PE=1 SV=1                                      | 53232  | 116 | 129  | 2   | 3   | 2  | 4.3  | 4.3  |    |
| MRP_MOUSE   | Marcks1  | MARCKS-related protein OS=Mus musculus GN=Marcks1 PE=1 SV=2                                             | 20153  | 77  | 59   | 2   | 1   | 2  | 14   | 6.5  |    |
| MVP_MOUSE   | Mvp      | Major vault protein OS=Mus musculus GN=Mvp PE=1 SV=4                                                    | 95865  | 62  | 156  | 2   | 4   | 2  | 2.7  | 6.2  |    |
| MYADM_MOUSE | Myadm    | Myeloid-associated differentiation marker OS=Mus musculus GN=Myadm PE=1 SV=1                            | 35261  | 69  | 77   | 5   | 5   | 1  | 5.3  | 5.3  |    |
| MYH9_MOUSE  | Myh9     | Myosin-9 OS=Mus musculus GN=Myh9 PE=1 SV=4                                                              | 226232 | 535 | 828  | 16  | 21  | 15 | 12.7 | 14.5 |    |
| MYL6_MOUSE  | Myl6     | Myosin light polypeptide 6 OS=Mus musculus GN=Myl6 PE=1 SV=3                                            | 16919  | 57  | 138  | 2   | 4   | 2  | 15.9 | 29.1 |    |
| MYO1C_MOUSE | Myo1c    | Unconventional myosin-1c OS=Mus musculus GN=Myo1c PE=1 SV=2                                             | 121868 | 338 | 595  | 12  | 20  | 9  | 13.8 | 17.7 |    |
| NDKA_MOUSE  | Nme1     | Nucleoside diphosphate kinase A OS=Mus musculus GN=Nme1 PE=1 SV=1                                       | 17197  | 31  | 68   | 2   | 5   | 1  | 11.2 | 21.1 |    |
| NIBAN_MOUSE | Fam129a  | Protein Niban OS=Mus musculus GN=Fam129a PE=1 SV=2                                                      | 102585 | 60  | 405  | 2   | 14  | 2  | 2.8  | 12.7 |    |
| NID2_MOUSE  | Nid2     | Nidogen-2 OS=Mus musculus GN=Nid2 PE=1 SV=2                                                             | 153816 | 167 | 75   | 4   | 2   | 4  | 4.1  | 1.6  |    |
| PDC6I_MOUSE | Pdcd6ip  | Programmed cell death 6-interacting protein OS=Mus musculus GN=Pdcd6ip PE=1 SV=1                        | 95964  | 164 | 224  | 6   | 6   | 5  | 8.2  | 8.1  |    |
| PEBP1_MOUSE | Pebp1    | Phosphatidylethanolamine-binding protein 1 OS=Mus musculus GN=Pebp1 PE=1 SV=1                           | 20817  | 33  | 185  | 1   | 5   | 1  | 13.9 | 32.6 |    |
| PGBM_MOUSE  | Hspg2    | Basement membrane-specific heparan sulfate proteoglycan core protein OS=Mus musculus GN=Hspg2 PE=1 SV=1 | 398039 | 892 | 242  | 29  | 5   | 20 | 7.6  | 1.4  |    |
| PPIA_MOUSE  | Ppia     | Peptidyl-prolyl cis-trans isomerase A OS=Mus musculus GN=Ppia PE=1 SV=2                                 | 17960  | 212 | 239  | 12  | 16  | 6  | 31.7 | 34.8 |    |
| PRDX1_MOUSE | Prdx1    | Peroxiredoxin-1 OS=Mus musculus GN=Prdx1 PE=1 SV=1                                                      | 22162  | 108 | 288  | 4   | 12  | 3  | 16.1 | 40.2 |    |
| PRDX2_MOUSE | Prdx2    | Peroxiredoxin-2 OS=Mus musculus GN=Prdx2 PE=1 SV=3                                                      | 21765  | 38  | 74   | 1   | 2   | 1  | 4    | 17.2 |    |
| PRIO_MOUSE  | Prnp     | Major prion protein OS=Mus musculus GN=Prnp PE=1 SV=2                                                   | 27960  | 33  | 81   | 1   | 2   | 1  | 3.5  | 7.1  |    |
| PROF1_MOUSE | Pfn1     | Profilin-1 OS=Mus musculus GN=Pfn1 PE=1 SV=2                                                            | 14948  | 232 | 275  | 8   | 11  | 4  | 42.1 | 42.1 |    |
| PTK7_MOUSE  | Ptk7     | Inactive tyrosine-protein kinase 7 OS=Mus musculus GN=Ptk7 PE=1 SV=1                                    | 117457 | 284 | 181  | 12  | 5   | 8  | 11.7 | 5.6  |    |
| RAB10_MOUSE | Rab10    | Ras-related protein Rab-10 OS=Mus musculus GN=Rab10 PE=1 SV=1                                           | 22527  | 173 | 272  | 7   | 12  | 4  | 20   | 26   |    |
| RAB14_MOUSE | Rab14    | Ras-related protein Rab-14 OS=Mus musculus GN=Rab14 PE=1 SV=3                                           | 23882  | 83  | 191  | 5   | 8   | 2  | 8.4  | 19.1 |    |
| RADI_MOUSE  | Rdx      | Radixin OS=Mus musculus GN=Rdx PE=1 SV=3                                                                | 68500  | 220 | 364  | 9   | 11  | 6  | 11.3 | 18.4 |    |
| RAP1A_MOUSE | Rap1a    | Ras-related protein Rap-1A OS=Mus musculus GN=Rap1a PE=1 SV=1                                           | 20974  | 244 | 334  | 13  | 17  | 5  | 27.2 | 30.4 |    |
| RAP2B_MOUSE | Rap2b    | Ras-related protein Rap-2b OS=Mus musculus GN=Rap2b PE=1 SV=1                                           | 20491  | 43  | 83   | 1   | 2   | 2  | 6.6  | 20.8 |    |
| RHOA_MOUSE  | Rhoa     | Transforming protein RhoA OS=Mus musculus GN=Rhoa PE=1 SV=1                                             | 21768  | 118 | 201  | 2   | 11  | 1  | 13   | 31.6 |    |
| RRAS_MOUSE  | Rras     | Ras-related protein R-Ras OS=Mus musculus GN=Rras PE=1 SV=1                                             | 23749  | 90  | 147  | 2   | 4   | 2  | 10.6 | 21.1 |    |
| RRAS2_MOUSE | Rras2    | Ras-related protein R-Ras2 OS=Mus musculus GN=Rras2 PE=1 SV=1                                           | 23385  | 120 | 173  | 2   | 4   | 2  | 13.7 | 23.5 |    |
| RS27A_MOUSE | Rps27a   | Ubiquitin-40S ribosomal protein S27a OS=Mus musculus GN=Rps27a PE=1 SV=2                                | 17939  | 107 | 186  | 8   | 13  | 2  | 16   | 30.1 |    |
| RS8_MOUSE   | Rps8     | 40S ribosomal protein S8 OS=Mus musculus GN=Rps8 PE=1 SV=2                                              | 24190  | 34  | 39   | 1   | 1   | 1  | 4.3  | 4.3  |    |
| S10AA_MOUSE | S100a10  | Protein S100-A10 OS=Mus musculus GN=S100a10 PE=1 SV=2                                                   | 11179  | 74  | 97   | 4   | 6   | 2  | 35.1 | 35.1 |    |
| SYAC_MOUSE  | Aars     | Alanine--tRNA ligase, cytoplasmic OS=Mus musculus GN=Aars PE=1 SV=1                                     | 106841 | 57  | 36   | 2   | 1   | 1  | 3.7  | 1    |    |
| SYG_MOUSE   | Gars     | Glycine--tRNA ligase OS=Mus musculus GN=Gars PE=1 SV=1                                                  | 81826  | 35  | 94   | 1   | 3   | 1  | 1.4  | 5.3  |    |
| TBA1A_MOUSE | Tuba1a   | Tubulin alpha-1A chain OS=Mus musculus GN=Tuba1a PE=1 SV=1                                              | 50104  | 391 | 323  | 11  | 9   | 7  | 22.2 | 17.3 |    |
| TBB5_MOUSE  | Tubb5    | Tubulin beta-5 chain OS=Mus musculus GN=Tubb5 PE=1 SV=1                                                 | 49639  | 472 | 449  | 22  | 24  | 9  | 26.4 | 31.3 |    |
| TCPB_MOUSE  | Cct2     | T-complex protein 1 subunit beta OS=Mus musculus GN=Cct2 PE=1 SV=4                                      | 57441  | 89  | 22   | 79  | 2   | 2  | 6.9  | 5.6  |    |
| TENA_MOUSE  | Tnc      | Tenascin OS=Mus musculus GN=Tnc PE=1 SV=1                                                               | 231659 | 209 | 84   | 5   | 2   | 5  | 3.8  | 2.5  |    |
| TERA_MOUSE  | Vcp      | Transitional endoplasmic reticulum ATPase OS=Mus musculus GN=Vcp PE=1 SV=4                              | 89266  | 71  | 277  | 2   | 8   | 2  | 4    | 13   |    |

|             |          |                                                                                             |        |     |      |    |     |   |    |      |      |
|-------------|----------|---------------------------------------------------------------------------------------------|--------|-----|------|----|-----|---|----|------|------|
| TFR1_MOUSE  | Tfrc     | Transferrin receptor protein 1 OS=Mus musculus GN=Tfrc PE=1 SV=1                            | 85677  | 179 | 158  | 10 | 6   | 4 | 4  | 6    | 5.8  |
| THY1_MOUSE  | Thy1     | Thy-1 membrane glycoprotein OS=Mus musculus GN=Thy1 PE=1 SV=1                               | 18069  | 66  | 189  | 6  | 20  | 2 | 4  | 15.4 | 23.5 |
| TLN1_MOUSE  | Tln1     | Talin-1 OS=Mus musculus GN=Tln1 PE=1 SV=2                                                   | 269653 | 107 | 352  | 2  | 7   | 7 | 1  | 3.4  |      |
| TPIS_MOUSE  | Tpi1     | Triosephosphate isomerase OS=Mus musculus GN=Tpi1 PE=1 SV=4                                 | 32171  | 214 | 185  | 7  | 5   | 5 | 4  | 20.4 | 15.7 |
| UBE2N_MOUSE | Ube2n    | Ubiquitin-conjugating enzyme E2 N OS=Mus musculus GN=Ube2n PE=1 SV=1                        | 17127  | 41  | 60   | 1  | 1   | 1 | 1  | 7.2  | 7.2  |
| VAT1_MOUSE  | Vat1     | Synaptic vesicle membrane protein VAT-1 homolog OS=Mus musculus GN=Vat1 PE=1 SV=1           | 43069  | 252 | 345  | 14 | 16  | 7 | 7  | 28.8 | 23.4 |
| VIME_MOUSE  | Vim      | Vimentin OS=Mus musculus GN=Vim PE=1 SV=3                                                   | 53655  | 358 | 349  | 11 | 11  | 8 | 8  | 19.1 | 16.1 |
| VINC_MOUSE  | Vcl      | Vinculin OS=Mus musculus GN=Vcl PE=1 SV=4                                                   | 116644 | 60  | 286  | 2  | 8   | 2 | 8  | 3.3  | 9.9  |
| WDR1_MOUSE  | Wdr1     | WD repeat-containing protein 1 OS=Mus musculus GN=Wdr1 PE=1 SV=3                            | 66365  | 67  | 36   | 3  | 1   | 2 | 1  | 4    | 1.3  |
| AK1A1_MOUSE | Akr1a1   | Alcohol dehydrogenase [NADP(+)] OS=Mus musculus GN=Akr1a1 PE=1 SV=3                         | 36564  | 39  |      | 1  |     | 1 |    | 5.8  |      |
| ANT3_MOUSE  | Serpinc1 | Antithrombin-III OS=Mus musculus GN=Serpinc1 PE=1 SV=1                                      | 51971  | 60  |      | 2  |     | 2 |    | 6.2  |      |
| APOM_MOUSE  | Apom     | Apolipoprotein M OS=Mus musculus GN=Apom PE=1 SV=1                                          | 21259  | 59  |      | 1  |     | 1 |    | 4.2  |      |
| ARF2_MOUSE  | Arf2     | ADP-ribosylation factor 2 OS=Mus musculus GN=Arf2 PE=1 SV=2                                 | 20733  | 219 |      | 7  |     | 5 |    | 43.6 |      |
| ASNS_MOUSE  | Asns     | Asparagine synthetase [glutamine-hydrolyzing] OS=Mus musculus GN=Asns PE=1 SV=1             | 64241  | 31  |      | 1  |     | 1 |    | 1.6  |      |
| CTR1_MOUSE  | Slc7a1   | High affinity cationic amino acid transporter 1 OS=Mus musculus GN=Slc7a1 PE=1 SV=1         | 67048  | 35  |      | 1  |     | 1 |    | 3.1  |      |
| GAPR1_MOUSE | Glpr2    | Golgi-associated plant pathogenesis-related protein 1 OS=Mus musculus GN=Glpr2              | 17080  | 43  |      | 1  |     | 1 |    | 8.4  |      |
| GNAI3_MOUSE | Gnai3    | Guanine nucleotide-binding protein G(k) subunit alpha OS=Mus musculus GN=Gnai3              | 40512  | 144 |      | 8  |     | 3 |    | 11.6 |      |
| GTR1_MOUSE  | Slc2a1   | Solute carrier family 2, facilitated glucose transporter member 1 OS=Mus musculus GN=Slc2a1 | 53949  | 81  |      | 4  |     | 2 |    | 3.7  |      |
| H4_MOUSE    | Hist1h4a | Histone H4 OS=Mus musculus GN=Hist1h4a PE=1 SV=2                                            | 11360  | 33  |      |    |     | 1 |    | 9.7  |      |
| H571A_MOUSE | Hspa1a   | Heat shock 70 kDa protein 1A OS=Mus musculus GN=Hspa1a PE=1 SV=2                            | 70036  | 197 |      | 6  |     | 1 |    | 7.6  |      |
| K1C17_MOUSE | Krt17    | Keratin, type I cytoskeletal 17 OS=Mus musculus GN=Krt17 PE=1 SV=3                          | 48132  | 113 |      | 10 |     | 3 |    | 6.2  |      |
| K2C1_MOUSE  | Krt1     | Keratin, type II cytoskeletal 1 OS=Mus musculus GN=Krt1 PE=1 SV=4                           | 65565  | 168 |      | 11 |     | 2 |    | 3.6  |      |
| LAMA4_MOUSE | Lama4    | Laminin subunit alpha-4 OS=Mus musculus GN=Lama4 PE=1 SV=2                                  | 201692 | 63  |      | 2  |     | 2 |    | 1.8  |      |
| NID1_MOUSE  | Nid1     | Nidogen-1 OS=Mus musculus GN=Nid1 PE=1 SV=2                                                 | 136450 | 65  |      | 1  |     | 1 |    | 1.4  |      |
| PGAM1_MOUSE | Pgam1    | Phosphoglycerate mutase 1 OS=Mus musculus GN=Pgam1 PE=1 SV=3                                | 28814  | 78  |      | 1  |     | 1 |    | 7.1  |      |
| PGK1_MOUSE  | Pgk1     | Phosphoglycerate kinase 1 OS=Mus musculus GN=Pgk1 PE=1 SV=4                                 | 44522  | 31  |      | 1  |     | 1 |    | 4.3  |      |
| PLAK_MOUSE  | Jup      | Junction plakoglobin OS=Mus musculus GN=Jup PE=1 SV=3                                       | 81749  | 33  |      | 1  |     | 1 |    | 2.4  |      |
| RAB5C_MOUSE | Rab5c    | Ras-related protein Rab-5C OS=Mus musculus GN=Rab5c PE=1 SV=2                               | 23398  | 43  |      | 1  |     | 1 |    | 6.5  |      |
| RALA_MOUSE  | Rala     | Ras-related protein Ral-A OS=Mus musculus GN=Rala PE=1 SV=1                                 | 23538  | 109 |      | 3  |     | 3 |    | 25.2 |      |
| RAP2C_MOUSE | Rap2c    | Ras-related protein Rap-2C OS=Mus musculus GN=Rap2c PE=1 SV=1                               | 20731  | 64  |      | 2  |     | 2 |    | 14.8 |      |
| RL8_MOUSE   | Rpl8     | 60S ribosomal protein L8 OS=Mus musculus GN=Rpl8 PE=1 SV=2                                  | 28007  | 34  |      | 1  |     | 1 |    | 4.3  |      |
| RS2_MOUSE   | Rps2     | 40S ribosomal protein S2 OS=Mus musculus GN=Rps2 PE=1 SV=3                                  | 31212  | 51  |      | 1  |     | 1 |    | 4.4  |      |
| SF3A3_MOUSE | Sf3a3    | Splicing factor 3A subunit 3 OS=Mus musculus GN=Sf3a3 PE=1 SV=2                             | 58805  | 39  |      | 1  |     | 1 |    | 1.4  |      |
| STOM_MOUSE  | Stom     | Erythrocyte band 7 integral membrane protein OS=Mus musculus GN=Stom PE=1 SV=1              | 31355  | 95  |      | 3  |     | 3 |    | 15.1 |      |
| TCPZ_MOUSE  | Cct6a    | T-complex protein 1 subunit zeta OS=Mus musculus GN=Cct6a PE=1 SV=3                         | 57968  | 31  |      | 1  |     | 1 |    | 3.2  |      |
| ACTN4_MOUSE | Actn4    | Alpha-actinin-4 OS=Mus musculus GN=Actn4 PE=1 SV=1                                          | 104911 |     | 388  |    | 9   |   | 7  |      | 10.1 |
| AEBP1_MOUSE | Aebp1    | Adipocyte enhancer-binding protein 1 OS=Mus musculus GN=Aebp1 PE=1 SV=1                     | 128284 |     | 158  |    | 4   |   | 3  |      | 3.1  |
| ANO6_MOUSE  | Ano6     | Anoctamin-6 OS=Mus musculus GN=Ano6 PE=1 SV=1                                               | 106186 |     | 108  |    | 3   |   | 3  |      | 3.4  |
| ANX11_MOUSE | Anxa11   | Annexin A11 OS=Mus musculus GN=Anxa11 PE=1 SV=2                                             | 54045  |     | 40   |    | 1   |   | 1  |      | 2.4  |
| ANXA7_MOUSE | Anxa7    | Annexin A7 OS=Mus musculus GN=Anxa7 PE=1 SV=2                                               | 49893  |     | 77   |    | 2   |   | 2  |      | 5.6  |
| APOA1_MOUSE | Apoa1    | Apolipoprotein A-I OS=Mus musculus GN=Apoa1 PE=1 SV=2                                       | 30597  |     | 38   |    | 2   |   | 1  |      | 3.8  |
| AQP1_MOUSE  | Aqp1     | Aquaporin-1 OS=Mus musculus GN=Aqp1 PE=1 SV=3                                               | 28775  |     | 172  |    | 7   |   | 4  |      | 24.5 |
| ARF5_MOUSE  | Arf5     | ADP-ribosylation factor 5 OS=Mus musculus GN=Arf5 PE=1 SV=2                                 | 20517  |     | 90   |    | 5   |   | 2  |      | 11.7 |
| ARPC2_MOUSE | Arpc2    | Actin-related protein 2/3 complex subunit 2 OS=Mus musculus GN=Arpc2 PE=1 SV=1              | 34336  |     | 50   |    | 1   |   | 1  |      | 3.3  |
| ASM3B_MOUSE | Smpd3b   | Acid sphingomyelinase-like phosphodiesterase 3b OS=Mus musculus GN=Smpd3b                   | 51567  |     | 180  |    | 4   |   | 4  |      | 14.7 |
| AT1B3_MOUSE | Atp1b3   | Sodium/potassium-transporting ATPase subunit beta-3 OS=Mus musculus GN=Atp1b3               | 31755  |     | 33   |    | 1   |   | 1  |      | 5    |
| AT2B4_MOUSE | Atp2b4   | Plasma membrane calcium-transporting ATPase 4 OS=Mus musculus GN=Atp2b4                     | 132984 |     | 125  |    | 4   |   | 3  |      | 3.7  |
| CAND1_MOUSE | Cand1    | Cullin-associated NEDD8-dissociated protein 1 OS=Mus musculus GN=Cand1 PE=1 SV=1            | 136245 |     | 33   |    | 1   |   | 1  |      | 0.7  |
| CAPG_MOUSE  | Capg     | Macrophage-capping protein OS=Mus musculus GN=Capg PE=1 SV=2                                | 39216  |     | 97   |    | 2   |   | 2  |      | 8    |
| CAPZB_MOUSE | Capzb    | F-actin-capping protein subunit beta OS=Mus musculus GN=Capzb PE=1 SV=3                     | 31326  |     | 40   |    | 1   |   | 1  |      | 2.9  |
| CATB_MOUSE  | Ctsb     | Cathepsin B OS=Mus musculus GN=Ctsb PE=1 SV=2                                               | 37256  |     | 205  |    | 5   |   | 4  |      | 15.9 |
| CATD_MOUSE  | Ctsd     | Cathepsin D OS=Mus musculus GN=Ctsd PE=1 SV=1                                               | 44925  |     | 194  |    | 5   |   | 4  |      | 12.4 |
| CD109_MOUSE | Cd109    | CD109 antigen OS=Mus musculus GN=Cd109 PE=1 SV=1                                            | 161557 |     | 174  |    | 5   |   | 4  |      | 3.6  |
| CD9_MOUSE   | Cd9      | CD9 antigen OS=Mus musculus GN=Cd9 PE=1 SV=2                                                | 25241  |     | 43   |    | 6   |   | 1  |      | 3.1  |
| CERU_MOUSE  | Cp       | Ceruloplasmin OS=Mus musculus GN=Cp PE=1 SV=2                                               | 121074 |     | 62   |    | 2   |   | 2  |      | 3.1  |
| CHM4B_MOUSE | Chmp4b   | Charged multivesicular body protein 4b OS=Mus musculus GN=Chmp4b PE=1 SV=2                  | 24921  |     | 70   |    | 2   |   | 2  |      | 11.2 |
| COSA1_MOUSE | Col5a1   | Collagen alpha-1(V) chain OS=Mus musculus GN=Col5a1 PE=1 SV=2                               | 183564 |     | 33   |    | 1   |   | 1  |      | 0.5  |
| CO6A1_MOUSE | Col6a1   | Collagen alpha-1(VI) chain OS=Mus musculus GN=Col6a1 PE=1 SV=1                              | 108422 |     | 1441 |    | 117 |   | 21 |      | 26   |
| CO6A2_MOUSE | Col6a2   | Collagen alpha-2(VI) chain OS=Mus musculus GN=Col6a2 PE=1 SV=3                              | 110266 |     | 871  |    | 50  |   | 19 |      | 23   |
| CTL2_MOUSE  | Slc44a2  | Choline transporter-like protein 2 OS=Mus musculus GN=Slc44a2 PE=1 SV=2                     | 80057  |     | 71   |    | 2   |   | 2  |      | 3.4  |
| DCTN1_MOUSE | Dctn1    | Dynactin subunit 1 OS=Mus musculus GN=Dctn1 PE=1 SV=3                                       | 141588 |     | 62   |    | 1   |   | 1  |      | 0.9  |
| DCTN2_MOUSE | Dctn2    | Dynactin subunit 2 OS=Mus musculus GN=Dctn2 PE=1 SV=3                                       | 44090  |     | 32   |    | 1   |   | 1  |      | 4.7  |
| DLG1_MOUSE  | Dlg1     | Disks large homolog 1 OS=Mus musculus GN=Dlg1 PE=1 SV=1                                     | 100058 |     | 122  |    | 4   |   | 3  |      | 3.9  |
| DPYL2_MOUSE | Dpysl2   | Dihydropyrimidinase-related protein 2 OS=Mus musculus GN=Dpysl2 PE=1 SV=2                   | 62239  |     | 115  |    | 3   |   | 3  |      | 9.8  |
| EMIL1_MOUSE | Emilin1  | EMILIN-1 OS=Mus musculus GN=Emilin1 PE=1 SV=1                                               | 107518 |     | 266  |    | 5   |   | 5  |      | 7.3  |
| FA5_MOUSE   | F5       | Coagulation factor V OS=Mus musculus GN=F5 PE=1 SV=1                                        | 247076 |     | 70   |    | 2   |   | 2  |      | 1    |

|             |           |                                                                                                        |        |  |     |  |    |  |    |      |
|-------------|-----------|--------------------------------------------------------------------------------------------------------|--------|--|-----|--|----|--|----|------|
| FAS_MOUSE   | Fasn      | Fatty acid synthase OS=Mus musculus GN=Fasn PE=1 SV=2                                                  | 272257 |  | 39  |  | 1  |  | 1  | 0.4  |
| FBLN1_MOUSE | Fbln1     | Fibulin-1 OS=Mus musculus GN=Fbln1 PE=1 SV=2                                                           | 77981  |  | 36  |  | 1  |  | 1  | 1.7  |
| FLNC_MOUSE  | Flnc      | Filamin-C OS=Mus musculus GN=Flnc PE=1 SV=3                                                            | 290937 |  | 134 |  | 4  |  | 3  | 1.1  |
| FMOD_MOUSE  | Fmod      | Fibromodulin OS=Mus musculus GN=Fmod PE=2 SV=1                                                         | 43027  |  | 101 |  | 2  |  | 2  | 11.2 |
| FPRP_MOUSE  | Ptgfrn    | Prostaglandin F2 receptor negative regulator OS=Mus musculus GN=Ptgfrn PE=1 SV=1                       | 98660  |  | 630 |  | 20 |  | 13 | 18.7 |
| GBB2_MOUSE  | Gnb2      | Guanine nucleotide-binding protein G(i)/G(s)/G(t) subunit beta-2 OS=Mus musculus GN=Gnb2 PE=1 SV=1     | 37307  |  | 253 |  | 10 |  | 5  | 13.2 |
| GDI1_MOUSE  | Gdi1      | Rab GDP dissociation inhibitor alpha OS=Mus musculus GN=Gdi1 PE=1 SV=3                                 | 50489  |  | 116 |  | 3  |  | 3  | 10.5 |
| GNA11_MOUSE | Gna11     | Guanine nucleotide-binding protein subunit alpha-11 OS=Mus musculus GN=Gna11 PE=1 SV=1                 | 41997  |  | 169 |  | 5  |  | 5  | 17.5 |
| GSTM1_MOUSE | Gstm1     | Glutathione S-transferase Mu 1 OS=Mus musculus GN=Gstm1 PE=1 SV=2                                      | 25953  |  | 142 |  | 4  |  | 3  | 17.4 |
| H2B1B_MOUSE | Hist1h2bb | Histone H2B type 1-B OS=Mus musculus GN=Hist1h2bb PE=1 SV=3                                            | 13944  |  | 49  |  | 1  |  | 1  | 11.9 |
| HTRA1_MOUSE | Htra1     | Serine protease HTRA1 OS=Mus musculus GN=Htra1 PE=1 SV=2                                               | 51182  |  | 62  |  | 4  |  | 2  | 8.5  |
| IGSF8_MOUSE | Igsf8     | Immunoglobulin superfamily member 8 OS=Mus musculus GN=Igsf8 PE=1 SV=2                                 | 64970  |  | 271 |  | 9  |  | 6  | 15.9 |
| K1C15_MOUSE | Krt15     | Keratin, type I cytoskeletal 15 OS=Mus musculus GN=Krt15 PE=1 SV=2                                     | 49107  |  | 70  |  | 3  |  | 2  | 3.5  |
| KCRB_MOUSE  | Ckb       | Creatine kinase B-type OS=Mus musculus GN=Ckb PE=1 SV=1                                                | 42686  |  | 37  |  | 1  |  | 1  | 5.5  |
| KCY_MOUSE   | Cmpk1     | UMP-CMP kinase OS=Mus musculus GN=Cmpk1 PE=1 SV=1                                                      | 22151  |  | 68  |  | 2  |  | 2  | 11.2 |
| MDHC_MOUSE  | Mdh1      | Malate dehydrogenase, cytoplasmic OS=Mus musculus GN=Mdh1 PE=1 SV=3                                    | 36488  |  | 53  |  | 1  |  | 1  | 3.9  |
| MMP2_MOUSE  | Mmp2      | 72 kDa type IV collagenase OS=Mus musculus GN=Mmp2 PE=1 SV=1                                           | 74055  |  | 102 |  | 3  |  | 3  | 8.6  |
| MRP1_MOUSE  | Abcc1     | Multidrug resistance-associated protein 1 OS=Mus musculus GN=Abcc1 PE=1 SV=1                           | 171075 |  | 36  |  | 1  |  | 1  | 0.6  |
| MTPN_MOUSE  | Mtpn      | Myotrophin OS=Mus musculus GN=Mtpn PE=1 SV=2                                                           | 12853  |  | 35  |  | 1  |  | 1  | 14.4 |
| MUG1_MOUSE  | Mug1      | Muringlobulin-1 OS=Mus musculus GN=Mug1 PE=1 SV=3                                                      | 165193 |  | 50  |  | 2  |  | 1  | 0.5  |
| NDKB_MOUSE  | Nme2      | Nucleoside diphosphate kinase 8 OS=Mus musculus GN=Nme2 PE=1 SV=1                                      | 17352  |  | 84  |  | 6  |  | 2  | 23.7 |
| NEP_MOUSE   | Mme       | Nepriylsin OS=Mus musculus GN=Mme PE=1 SV=3                                                            | 85648  |  | 236 |  | 8  |  | 6  | 11.1 |
| NRP2_MOUSE  | Nrp2      | Neuropilin-2 OS=Mus musculus GN=Nrp2 PE=1 SV=2                                                         | 104565 |  | 123 |  | 3  |  | 3  | 3.8  |
| NUCB1_MOUSE | Nucb1     | Nucleobindin-1 OS=Mus musculus GN=Nucb1 PE=1 SV=2                                                      | 53376  |  | 93  |  | 2  |  | 2  | 4.4  |
| PACN2_MOUSE | Pascin2   | Protein kinase C and casein kinase substrate in neurons protein 2 OS=Mus musculus GN=Pascin2 PE=1 SV=1 | 55798  |  | 48  |  | 1  |  | 1  | 1.9  |
| PCBP1_MOUSE | Pcbp1     | Poly(rC)-binding protein 1 OS=Mus musculus GN=Pcbp1 PE=1 SV=1                                          | 37474  |  | 83  |  | 2  |  | 2  | 5.3  |
| PCOC1_MOUSE | Pcolce    | Procollagen C-endopeptidase enhancer 1 OS=Mus musculus GN=Pcolce PE=1 SV=2                             | 50136  |  | 45  |  | 1  |  | 1  | 2.1  |
| PEDF_MOUSE  | Serpinf1  | Pigment epithelium-derived factor OS=Mus musculus GN=Serpinf1 PE=1 SV=2                                | 46205  |  | 194 |  | 8  |  | 5  | 21.3 |
| PKHO2_MOUSE | Plekho2   | Pleckstrin homology domain-containing family O member 2 OS=Mus musculus GN=Plekho2 PE=1 SV=1           | 53839  |  | 67  |  | 1  |  | 1  | 2.4  |
| PLTP_MOUSE  | Pltp      | Phospholipid transfer protein OS=Mus musculus GN=Pltp PE=1 SV=1                                        | 54419  |  | 89  |  | 2  |  | 2  | 6.3  |
| PLXB2_MOUSE | Plxnb2    | Plexin-B2 OS=Mus musculus GN=Plxnb2 PE=1 SV=1                                                          | 206099 |  | 108 |  | 2  |  | 2  | 1    |
| PPIC_MOUSE  | Ppic      | Peptidyl-prolyl cis-trans isomerase C OS=Mus musculus GN=Ppic PE=1 SV=1                                | 22780  |  | 389 |  | 27 |  | 7  | 48.6 |
| PSA2_MOUSE  | Psm2      | Proteasome subunit alpha type-2 OS=Mus musculus GN=Psm2 PE=1 SV=3                                      | 25910  |  | 46  |  | 1  |  | 1  | 9    |
| PSA5_MOUSE  | Psm5      | Proteasome subunit alpha type-5 OS=Mus musculus GN=Psm5 PE=1 SV=1                                      | 26394  |  | 68  |  | 1  |  | 1  | 5    |
| PSB5_MOUSE  | Psb5      | Proteasome subunit beta type-5 OS=Mus musculus GN=Psb5 PE=1 SV=3                                       | 28514  |  | 33  |  | 1  |  | 1  | 3.4  |
| PSB6_MOUSE  | Psb6      | Proteasome subunit beta type-6 OS=Mus musculus GN=Psb6 PE=1 SV=3                                       | 25362  |  | 41  |  | 1  |  | 1  | 4.2  |
| PSD12_MOUSE | Psm12     | 26S proteasome non-ATPase regulatory subunit 12 OS=Mus musculus GN=Psm12 PE=1 SV=1                     | 52861  |  | 43  |  | 1  |  | 1  | 2.2  |
| PSMD2_MOUSE | Psm2      | 26S proteasome non-ATPase regulatory subunit 2 OS=Mus musculus GN=Psm2 PE=1 SV=1                       | 100139 |  | 35  |  | 1  |  | 1  | 0.9  |
| PTPRA_MOUSE | Ptpra     | Receptor-type tyrosine-protein phosphatase alpha OS=Mus musculus GN=Ptpra PE=1 SV=1                    | 93638  |  | 38  |  | 1  |  | 1  | 2.2  |
| RAC1_MOUSE  | Rac1      | Ras-related C3 botulinum toxin substrate 1 OS=Mus musculus GN=Rac1 PE=1 SV=1                           | 21436  |  | 35  |  | 2  |  | 1  | 7.3  |
| RB11A_MOUSE | Rab11a    | Ras-related protein Rab-11A OS=Mus musculus GN=Rab11a PE=1 SV=3                                        | 24378  |  | 96  |  | 3  |  | 3  | 14.8 |
| RL4_MOUSE   | Rpl4      | 60S ribosomal protein L4 OS=Mus musculus GN=Rpl4 PE=1 SV=3                                             | 47124  |  | 34  |  | 1  |  | 1  | 1.9  |
| S29A1_MOUSE | Slc29a1   | Equilibrative nucleoside transporter 1 OS=Mus musculus GN=Slc29a1 PE=1 SV=3                            | 50159  |  | 45  |  | 2  |  | 1  | 2.6  |
| SAP_MOUSE   | Psap      | Prosaposin OS=Mus musculus GN=Psap PE=1 SV=2                                                           | 61381  |  | 116 |  | 6  |  | 3  | 7.2  |
| SDCB1_MOUSE | Sdcbp     | Syntenin-1 OS=Mus musculus GN=Sdcbp PE=1 SV=1                                                          | 32359  |  | 158 |  | 4  |  | 3  | 21.1 |
| SEPR_MOUSE  | Fap       | Prolyl endopeptidase FAP OS=Mus musculus GN=Fap PE=1 SV=1                                              | 87889  |  | 38  |  | 1  |  | 1  | 1.3  |
| SODC_MOUSE  | Sod1      | Superoxide dismutase [Cu-Zn] OS=Mus musculus GN=Sod1 PE=1 SV=2                                         | 15933  |  | 32  |  | 1  |  | 1  | 7.8  |
| SYDC_MOUSE  | Dars      | Aspartate--tRNA ligase, cytoplasmic OS=Mus musculus GN=Dars PE=1 SV=2                                  | 57111  |  | 44  |  | 1  |  | 1  | 2    |
| SYTC_MOUSE  | Tars      | Threonine--tRNA ligase, cytoplasmic OS=Mus musculus GN=Tars PE=1 SV=2                                  | 83303  |  | 69  |  | 2  |  | 2  | 2.2  |
| TAGL2_MOUSE | Tagln2    | Transgelin-2 OS=Mus musculus GN=Tagln2 PE=1 SV=4                                                       | 22381  |  | 34  |  | 1  |  | 1  | 5.5  |
| TCPE_MOUSE  | Cct5      | T-complex protein 1 subunit epsilon OS=Mus musculus GN=Cct5 PE=1 SV=1                                  | 59586  |  | 32  |  | 1  |  | 1  | 3.1  |
| TCPQ_MOUSE  | Cct8      | T-complex protein 1 subunit theta OS=Mus musculus GN=Cct8 PE=1 SV=3                                    | 59518  |  | 56  |  | 1  |  | 1  | 1.8  |
| TKT_MOUSE   | Tkt       | Transketolase OS=Mus musculus GN=Tkt PE=1 SV=1                                                         | 67588  |  | 106 |  | 3  |  | 3  | 8.2  |
| TSN4_MOUSE  | Tspan4    | Tetraspanin-4 OS=Mus musculus GN=Tspan4 PE=1 SV=1                                                      | 26036  |  | 52  |  | 1  |  | 1  | 10.5 |
| TSP2_MOUSE  | Thbs2     | Thrombospondin-2 OS=Mus musculus GN=Thbs2 PE=1 SV=2                                                    | 129798 |  | 89  |  | 2  |  | 2  | 3.2  |
| UBA1_MOUSE  | Uba1      | Ubiquitin-like modifier-activating enzyme 1 OS=Mus musculus GN=Uba1 PE=1 SV=1                          | 117734 |  | 97  |  | 2  |  | 2  | 1.9  |
| UBP5_MOUSE  | Usp5      | Ubiquitin carboxyl-terminal hydrolase 5 OS=Mus musculus GN=Usp5 PE=1 SV=1                              | 95772  |  | 31  |  | 1  |  | 1  | 1    |
| VAOD1_MOUSE | Atp6v0d1  | V-type proton ATPase subunit d 1 OS=Mus musculus GN=Atp6v0d1 PE=1 SV=2                                 | 40275  |  | 37  |  | 1  |  | 1  | 2.3  |
| VNN1_MOUSE  | Vnn1      | Pantetheinase OS=Mus musculus GN=Vnn1 PE=1 SV=3                                                        | 57054  |  | 40  |  | 2  |  | 1  | 2.5  |
| VPS35_MOUSE | Vps35     | Vacuolar protein sorting-associated protein 35 OS=Mus musculus GN=Vps35 PE=1 SV=1                      | 91655  |  | 39  |  | 2  |  | 1  | 1.4  |
